# Supplementary material for: Sulforaphane alleviates retinal ganglion cell death and inflammation by suppressing NLRP3 inflammasome activation in a rat model of retinal ischemia/reperfusion injury
Source: PubMed Central journal article supplement — Int J Immunopathol Pharmacol. 2019 Jul 3;33:2058738419861777. doi: 10.1177/2058738419861777 (PMC6610428; doi:10.1177/2058738419861777), 2019-07-03
Supplement: Supplementary_Materials_(1).pdf [file Supplementary_Materials_%281%29.pdf]

## Supplementary Materials

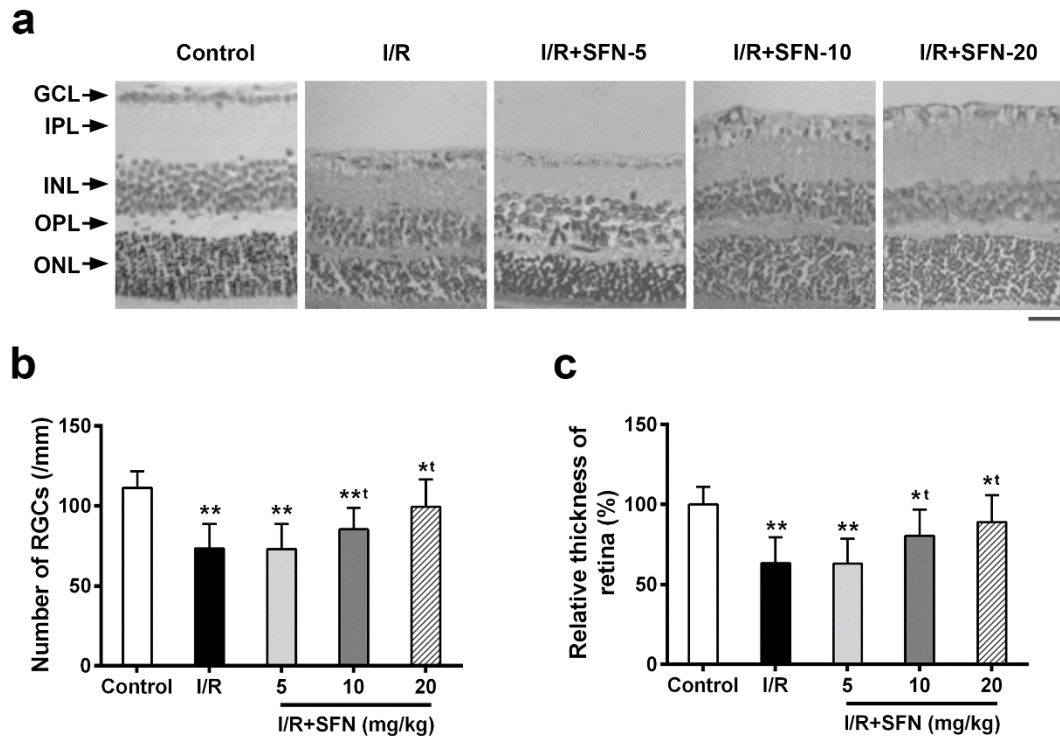

**Fig. S1 SFN administration inhibited I/R-induced retinal thickness change.** (a) H&E staining of retinal cross-sections in different treated groups and indicated retina layers. (b-c) The quantification of RGCs number (b) and the relative retinal tissue thickness (c) of control, I/R, and I/R+SFN (5, 10, 20 mg/kg) groups. Data are presented as mean  $\pm$  SD,  $n = 6$  for each group, \* $P < 0.05$ , \*\*  $P < 0.01$  compared to control group,  $^tP < 0.05$  compared to I/R group. Scale bar = 10  $\mu\text{m}$ . GCL ganglion cell layer, IPL inner plexiform layer, INL inner nuclear layer, OPL outer plexiform layer, ONL outer nuclear layer.

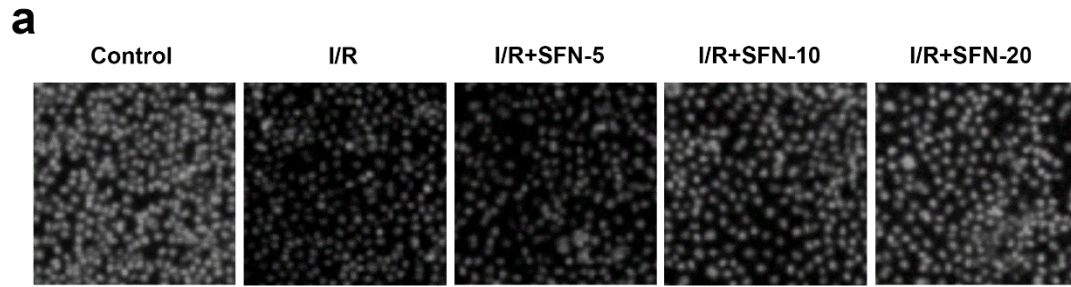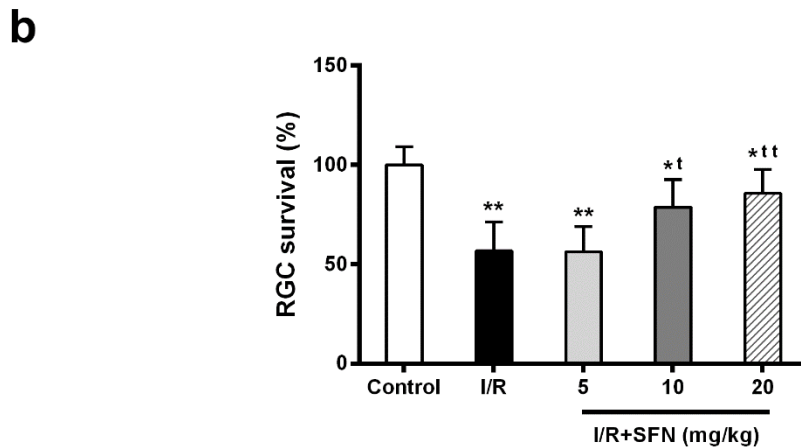

**Fig. S2 SFN administration prevented I/R-induced RGCs death in rat.** (a) FG labeling showed the surviving RGCs in control group, I/R injury group, and I/R+SFN (5, 10, 20 mg/kg) groups. (b) The quantification of RGC survival (%) in indicated groups. Data are presented as mean  $\pm$  SD,  $n = 6$  for each group, \* $P < 0.05$ , \*\*  $P < 0.01$  compared to control group, <sup>t</sup> $P < 0.05$ , <sup>tt</sup> $P < 0.01$  compared to I/R group. Scale bar = 50  $\mu\text{m}$ .

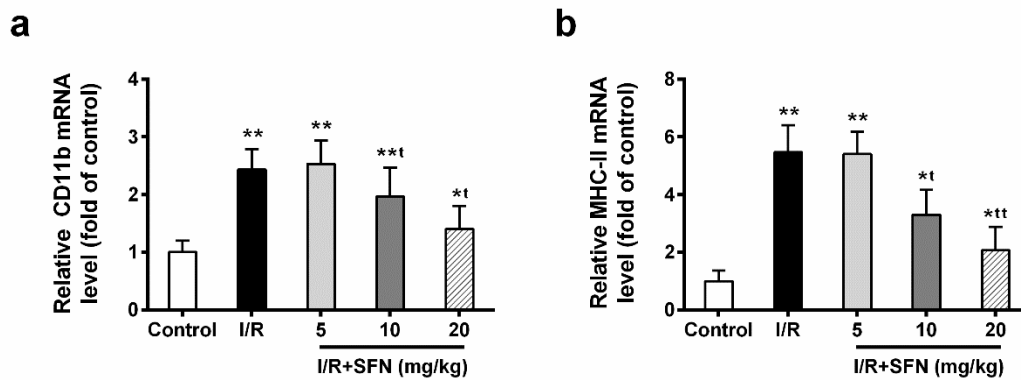

**Fig. S3 SFN administration inhibited microglia activation in retinas of I/R rats.**

The mRNA expression of microglial cell markers, CD11b (a) and MHC-II (b), were analyzed by qRT-PCR. Data are presented as mean  $\pm$  SD, n = 6 for each group, \* $P$  < 0.05, \*\*  $P$  < 0.01 compared to control group, †  $P$  < 0.05, ‡  $P$  < 0.01 compared to I/R group.
